# Supplementary material for: Poria promotes mitophagy and apoptosis in ovarian cancer cisplatin-resistant cells through modulation of the balance between glycolysis and oxidative phosphorylation
Source: Research Square preprint supplement (doi:10.21203/rs.3.rs-8511224/v1), 2026-01-09
Supplement: Supplementary file 1 [file c71fd5b8343a90a099efa2b5.pdf]

A

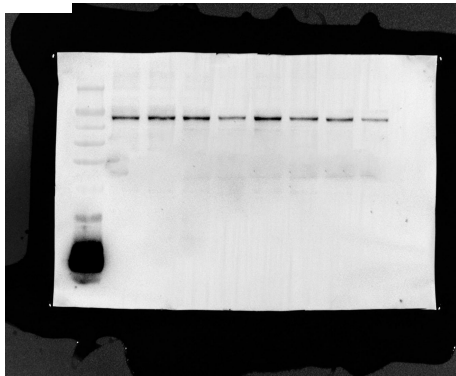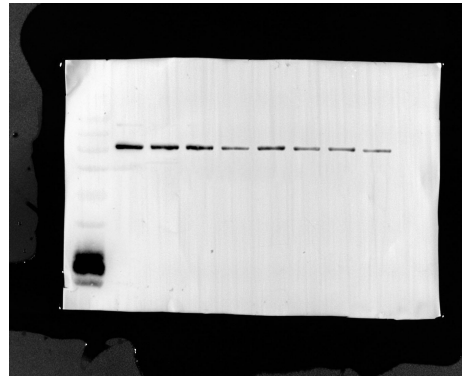

B

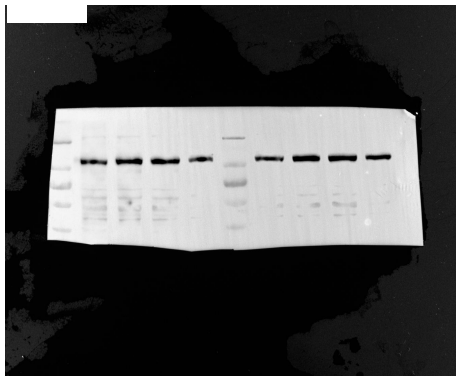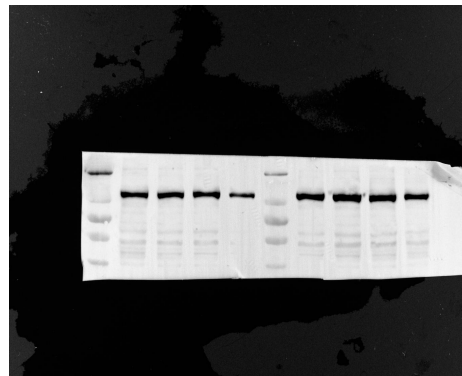

C

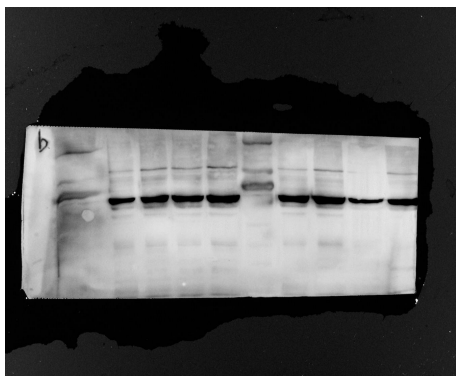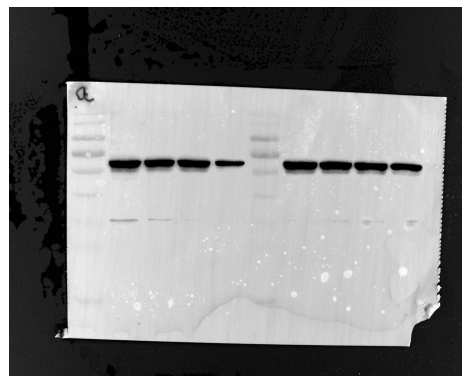

D

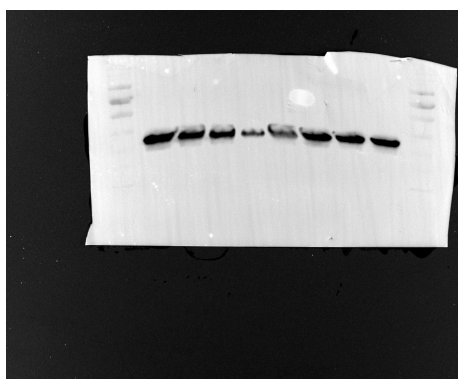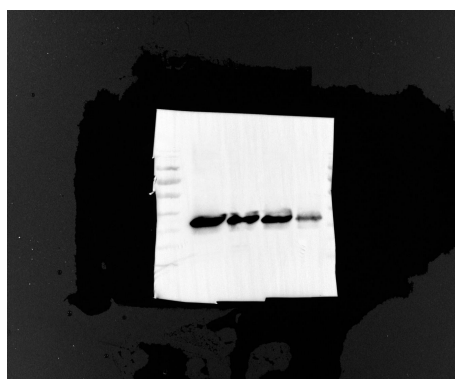

**Figure S1**

**A**

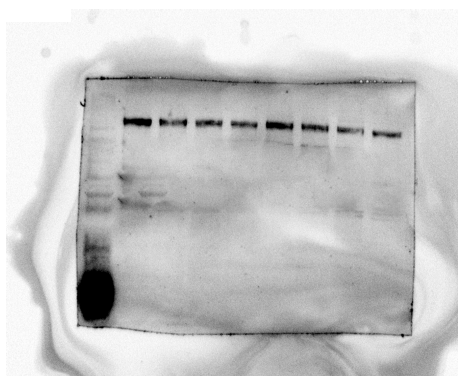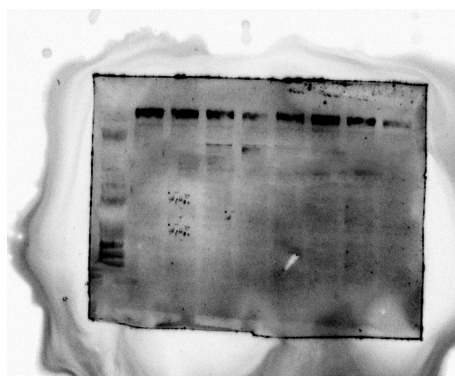

**B**

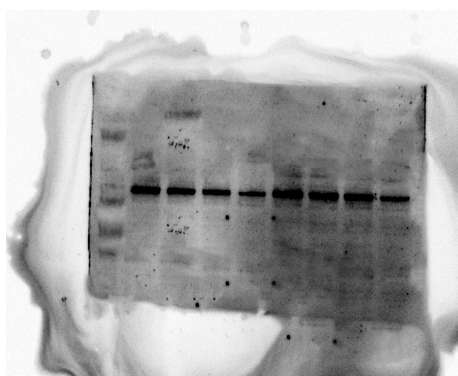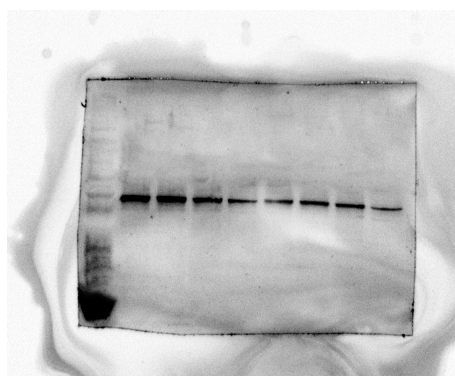

**C**

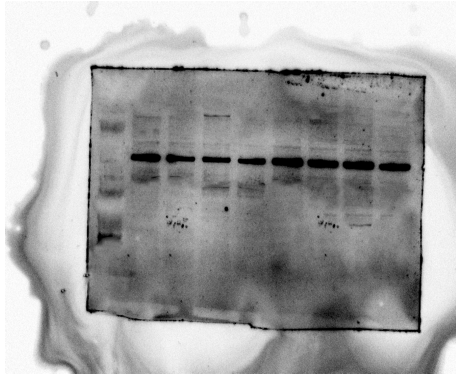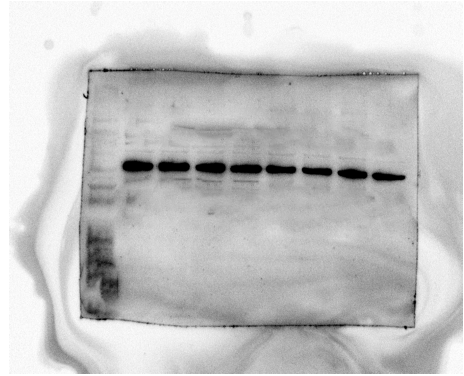

D

Figure S2

A

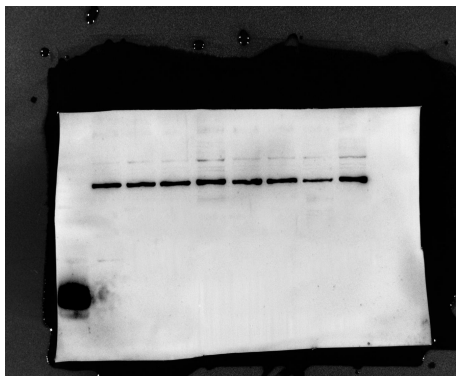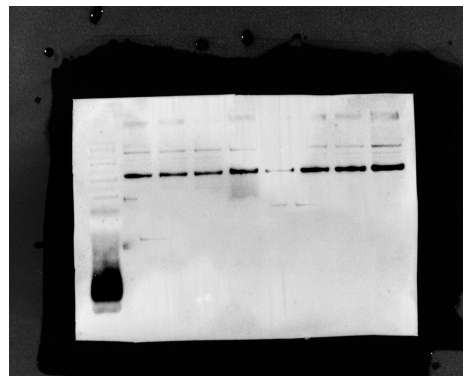

B

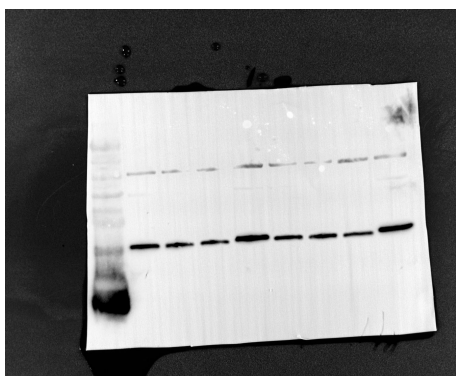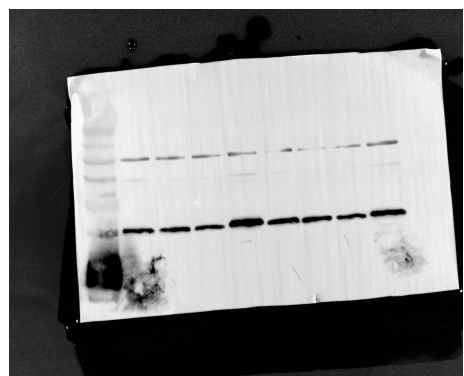

C

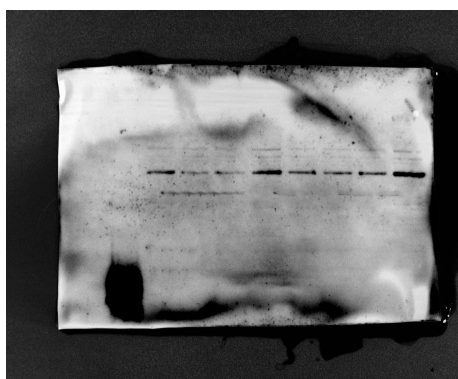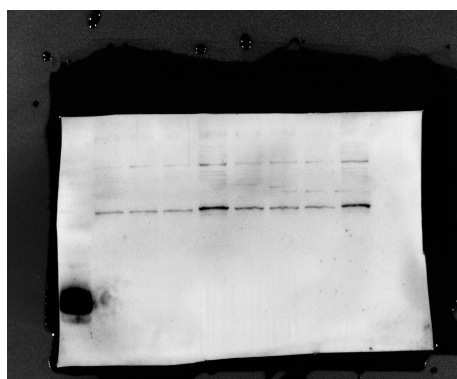

**D**

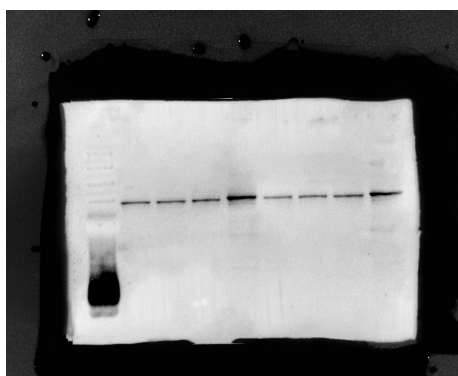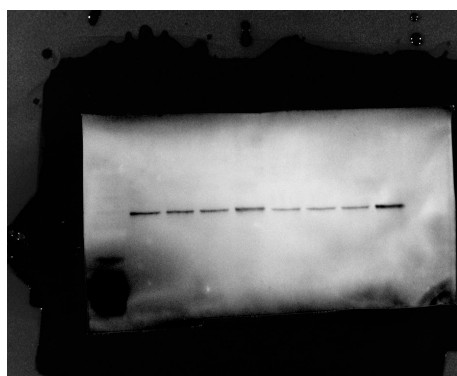

**E**

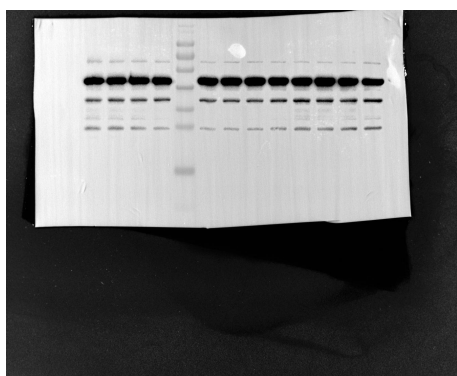

**Figure S3**

**A**

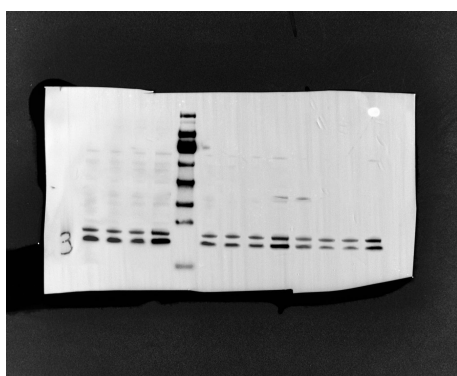

**B**

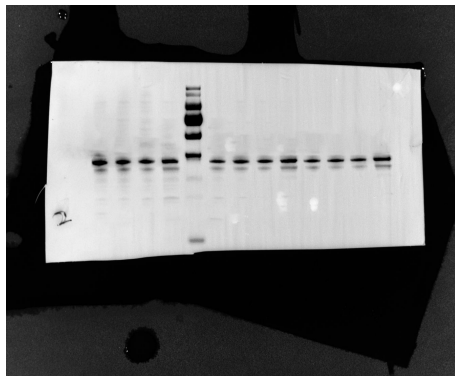

**C**

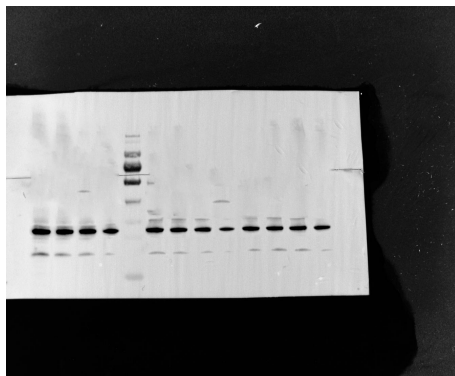

**D**

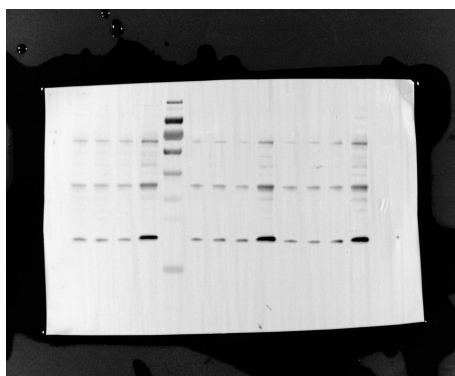

**E**

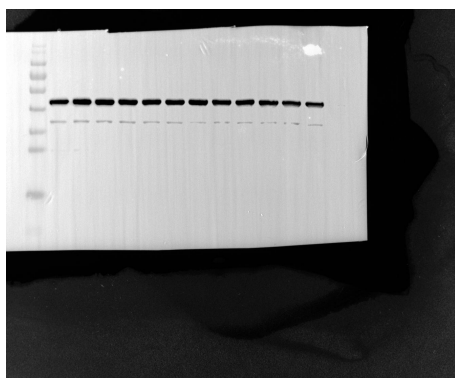

Figure S4

A

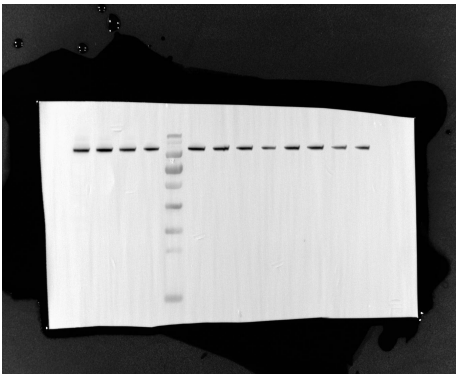

B

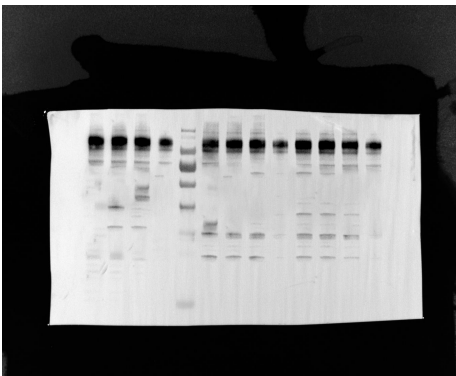

C

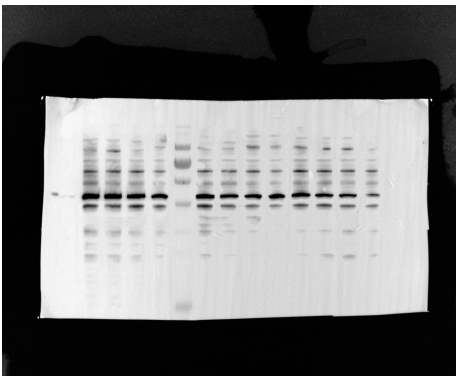

D

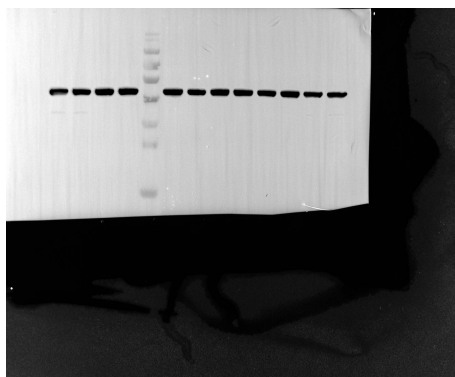

**Figure S5**

**A**

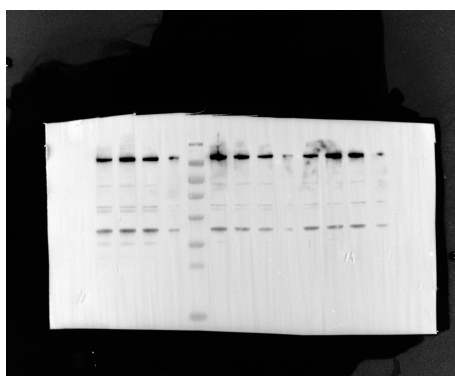

**B**

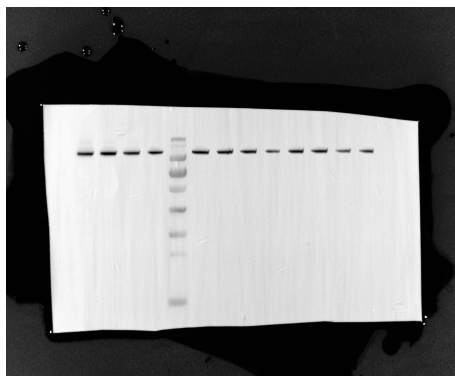

**C**

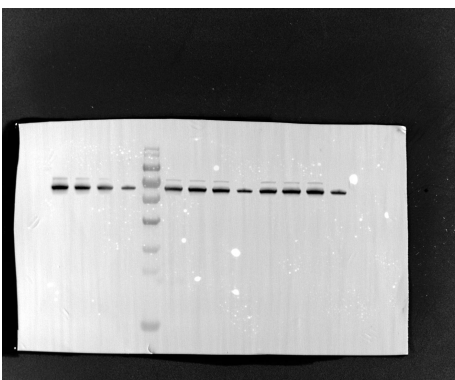

D

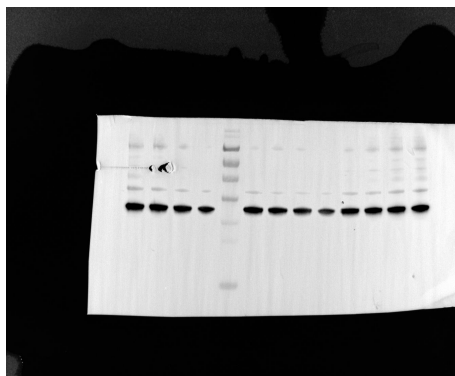

E

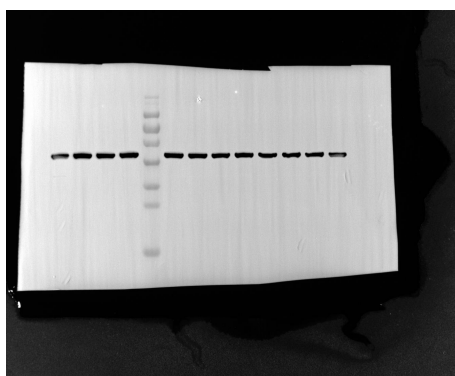

Figure S6

A

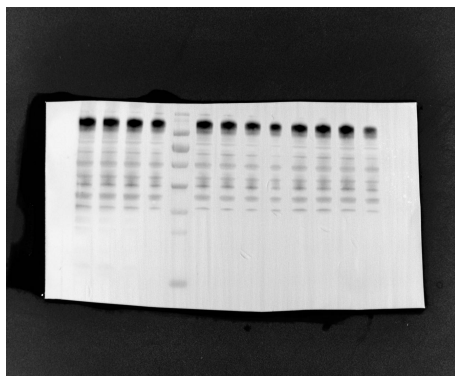

B

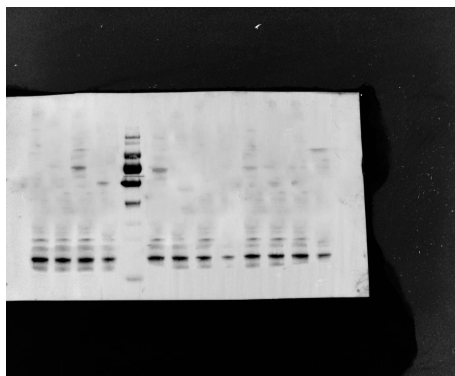



C

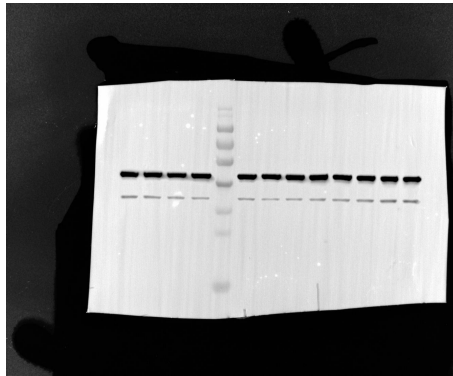

**Figure S7**

**Figure S1.** Figure 2-G in the manuscript, uncropped blots images of A2780/DDP cells, bright field exposure in the left image and ECL field exposure in the right image.A:HIF-1 $\alpha$ ; B:HK2; C:PKM2; D:LDHA

**Figure S2.** Figure 2-J in the manuscript, uncropped blots images of A2780/DDP cells, bright field exposure in the left image and ECL field exposure in the right image.A:ATP1; B:ATP5; C: $\beta$ -actin

**Figure S3.** Figure 3-B in the manuscript, uncropped blots images of A2780/DDP cells, bright field exposure in the left image and ECL field exposure in the right image.A:NF- $\kappa$ B; B:TGF-  $\beta$  1; C:PINK1; D:Parkin; E ;  $\beta$ -actin

**Figure S4.** Figure 4-C in the manuscript, uncropped blots images of A2780/DDP cells, bright field exposure in the left image and ECL field exposure in the right image.A:Caspase 3; B:Caspase 9;; C:Bcl2; D:BAX; E ;  $\beta$ -actin

**Figure S5.** Figure 4-E in the manuscript, uncropped blots images of A2780/DDP cells, bright field exposure in the left image and ECL field exposure in the right image.A:P-gp; B:MRP; C:BCRP; D: $\beta$ -actin

**Figure S6.** Figure 5-D in the manuscript, uncropped blots images of

A2780/DDP cells, bright field exposure in the left image and ECL field exposure in the right image. A: HIF-1 $\alpha$ ; B: HK2; C: PKM2; D: LDHA; E:  $\beta$ -actin

**Figure S7.** Figure 5-E in the manuscript, uncropped blots images of A2780/DDP cells, bright field exposure in the left image and ECL field exposure in the right image. A: ATP1; B: ATP5; C:  $\beta$ -actin
